# Supplementary material for: Investigating the Potential Accessibility to HIV Pre-Exposure Prophylaxis viaCommunity Pharmacies and Sexual Health Clinics: A Scoping Review of Two Integrated Care Systems in London
Source: Research Square preprint supplement (doi:10.21203/rs.3.rs-5054242/v1), 2024-09-27
Supplement: Supplementary file 1 [file 414f79a70b69c7c5ed1e0b76.docx]

**Tables**

**Table 1: Asset rating characteristics derived for rating pharmacy competence**

| **Rating** | **Asset Rating Description** |
| --- | --- |
| **Tier 0** | - No sexual health service offered |
| **Tier 1** | - Emergency hormonal contraception (EHC) - Chlamydia screening (with EHC) - Sexual Transmitted Infections (STIs) kit “click and collect” service - Condoms |
| **Tier 2** | - Emergency hormonal contraception (EHC) - Chlamydia screening (with EHC) - STI kit “click and collect” service - Condoms - Oral contraception - start up - Oral contraception – continuation - Injectable contraception (Sayana Press) - STI kit initiation - Chlamydia treatment - Hepatitis B vaccination (2nd & 3rd dose) |

**Table 2: Place-based assessment of community pharmacy landscape in 11 LAs in London**

| **ICS** | **Local Authority** | **Population (2022)** | **No. of Pharmacies** | **Per person** | **Sexual Health Clinics** | **PrEP Clinics** | **Offers SHS** | | | **Tier** | | | | **Offers Vaccinations** | **Has private consultation room**** |
| --- | --- | --- | --- | --- | --- | --- | --- | --- | --- | --- | --- | --- | --- | --- | --- |
| **Yes** | **No** | **Unknown** | **0** | **1** | **2** | **Unknown** |
| **N (%)** | **N (%)** | **N (%)** | **N (%)** | **N (%)** | **N (%)** | **N (%)** | **N (%)** | **N (%)** | **N (%)** | **N (%)** |
| **NWL** | Brent | 341,221 | 81 | 0.0002 | 0 (0.0) | 1  (16.7) | 69 (85.2) | 4  (4.9) | 8  (9.9) | 4  (4.9) | 62  (76.5) | 7  (8.6) | 8  (9.9) | 60  (74.1) | 70  (86.4) |
| Ealing | 369,973 | 76 | 0.0002 | 1  (16.7) | 0  (0.0) | 64 (84.2) | 9  (11.8) | 3  (3.9) | 9  (11.8) | 59  (77.6) | 5  (6.6) | 3  (3.9) | 64  (84.2) | 70  (92.1) |
| Hammersmith & Fulham | 185,238 | 40 | 0.0002 | 4  (66.7) | 1  (16.7) | 27 (67.5) | 11  (27.5) | 2  (5.0) | 11 (27.5) | 24  (60.0) | 3  (7.5) | 2  (5.0) | 37  (92.5) | 36  (90.0) |
| Harrow | 261,185 | 64 | 0.0002 | 0  (0.0) | 0  (0.0) | 44 (68.8) | 10  (15.6) | 10  (15.6) | 10 (15.6) | 37  (57.8) | 7 (10.9) | 10  (15.6) | 49  (76.6) | 53  (82.8) |
| Hillingdon | 310,681 | 64 | 0.0002 | 0  (0.0) | 0  (0.0) | 55 (85.9) | 8  (12.5) | 1  (1.6) | 8  (12.5) | 45  (70.3) | 10 (15.6) | 1  (1.6) | 57  (89.1) | 58  (90.6) |
| Hounslow | 290,488 | 53 | 0.0002 | 1  (16.7) | 1  (16.7) | 41 (77.4) | 9  (17.0) | 3  (5.7) | 9  (17.0) | 26  (49.1) | 15 (28.3) | 3  (5.7) | 42  (79.2) | 45  (84.9) |
| Westminster | 211,365 | 84 | 0.0004 | 0  (0.0) | 2  (33.3) | 58 (69.0) | 14  (16.7) | 12  (14.3) | 15 (17.9) | 52  (61.9) | 6  (7.1) | 11  (13.1) | 61  (72.6) | 66  (78.6) |
| Kensington & Chelsea | 146,154 | 40 | 0.0003 | 0  (0.0) | 1  (16.7) | 31 (77.5) | 7  (17.5) | 2  (5.0) | 7  (17.5) | 27  (67.5) | 4 (10.0) | 2  (5.0) | 35  (87.5) | 36  (90.0) |
| **All NWL** | **2,116,305** | **502** | **0.0002** | **6**  **(100.0)** | **6**  **(100.0)** | **389 (77.5)** | **72**  **(14.3)** | **41**  **(8.2)** | **73 (14.5)** | **332**  **(66.1)** | **57 (11.4)** | **40**  **(8.0)** | **405**  **(80.7)** | **424**  **(84.5)** |
| **NCL** | Barnet | 389,101 | 76 | 0.0002 | 2  (50.0) | 1  (33.3) | 61 (80.3) | 12  (15.8) | 3  (3.9) | 12 (15.8) | 53  (69.7) | 7  (9.2) | 4  (5.3) | 65  (85.5) | 72  (94.7) |
| Enfield | 327,224 | 57 | 0.0002 | 1  (25.0) | 1  (33.3) | 45 (78.9) | 9  (15.8) | 3  (5.3) | 9  (15.8) | 38  (66.7) | 9 (15.8) | 1  (1.8) | 47  (82.5) | 52  (91.2) |
| Haringey | 261,811 | 57 | 0.0002 | 1  (25.0) | 1  (33.3) | 48 (84.2) | 6  (10.5) | 3  (5.3) | 6  (10.5) | 25  (43.9) | 22 (38.6) | 4  (7.0) | 44  (77.2) | 51  (89.5) |
| **All 3 NCL** | **978,136** | **190** | **0.0002** | **4**  **(100.0)** | 3  (100.0) | **154 (81.1)** | **27**  **(14.2)** | **9**  **(4.7)** | **27 (14.2)** | **116**  **(61.1)** | **38 (20.0)** | **9**  **(4.7)** | **156**  **(82.1)** | **175**  **(92.1)** |
| **Total** | | **3,094,441** | **692** | **0.0002** | **10**  **(100.0)** | **9**  **(100.0)** | **543 (78.5)** | **99**  **(14.3)** | **50**  **(7.2)** | **100 (14.5)** | **448**  **(64.7)** | **95**  **(13.7)** | **49**  **(7.1)** | **561**  **(81.0)** | **609**  **(87.9)** |

*Population data from Office of National Statistics (20)

**Private consultation room – this is a room in the clinic where patients can discuss sensitive topics with their pharmacist in privacy.
